# Supplementary material for: Olfactory Receptor OR2K2 Expression in Human Choroid Plexus as a Potential Marker in Early Sporadic Alzheimer’s Disease
Source: MDPI journal article supplement (doi:10.3390/genes15030385), 2024-03-21
Supplement: s1 [file s1]

**Table S1** - List of primer sequences used for Selfie-digital PCR analysis.

| Gene                    | Primer sequences (5' to 3') |                         | Target exon |
|-------------------------|-----------------------------|-------------------------|-------------|
| Taste receptors, type 1 |                             |                         |             |
| TAS1R1                  | Fw                          | TGCCAGAGAACTACAACGAGG   | 6/5         |
|                         | Rv                          | GTGGTGAAGAAGGCGATCCA    |             |
|                         | Fw                          | ATGTGTATGCCACGCTGAGA    |             |
|                         | Rv                          | GCACCGTAGGGGAATAGTGG    |             |
| TAS1R2                  | Fw                          | CTGTAACCCCAACTACCGCA    | 6           |
|                         | Rv                          | CCCATGTAGGCGAAGCTGAA    |             |
| TAS1R3                  | Fw                          | CAGGGCTAAATCACCACCAGA   | 3           |
|                         | Rv                          | CTGAGGCGTTGCACTGAAGA    |             |
| Taste receptors, type 2 |                             |                         |             |
| TAS2R5                  | Fw                          | TTACGGAAGGACGAGGCCAA    | 1           |
|                         | Rv                          | AGGTCAGATCCCCTGGTAGTG   |             |
| TAS2R14                 | Fw                          | GACTGGGTCAAGGGAAGAAAGA  | 1           |
|                         | Rv                          | ACCAAACCAGGCTAATTCGAGA  |             |
| Olfactory receptors     |                             |                         |             |
| OR1L8                   | Fw                          | ACCGTGGTGACGCTCTTTTA    | 1           |
|                         | Rv                          | TTGACAGCGTAGGTGGATGG    |             |
| OR2H2                   | Fw                          | GGCACTCCTTCACTTAACCC    | 1           |
|                         | Rv                          | TGTGTGAGCCCCATTTCTT     |             |
| OR2K2                   | Fw                          | TGGTTCTCTTCGTCTTCAGCC   | 1           |
|                         | Rv                          | CATGGGGGTTTTAAGGCGTG    |             |
| OR7A5                   | Fw                          | CATGCCTGTCTCGTTTCCCT    | 1           |
|                         | Rv                          | TGTGTATCATTTCTGTTCCATT  |             |
| OR7A17                  | Fw                          | AACCAGAGAATGACACAGGGATT | 1           |
|                         | Rv                          | CATGGACAGAAACAGCCCAAAG  |             |
| OR13A1                  | Fw                          | CTGCGCTTGGATTTCTGTGG    | 4           |
|                         | Rv                          | CACCGTTGACGTAGGTGGAG    |             |

Fw, forward primer; Rv, reverse primer.

**(a)**

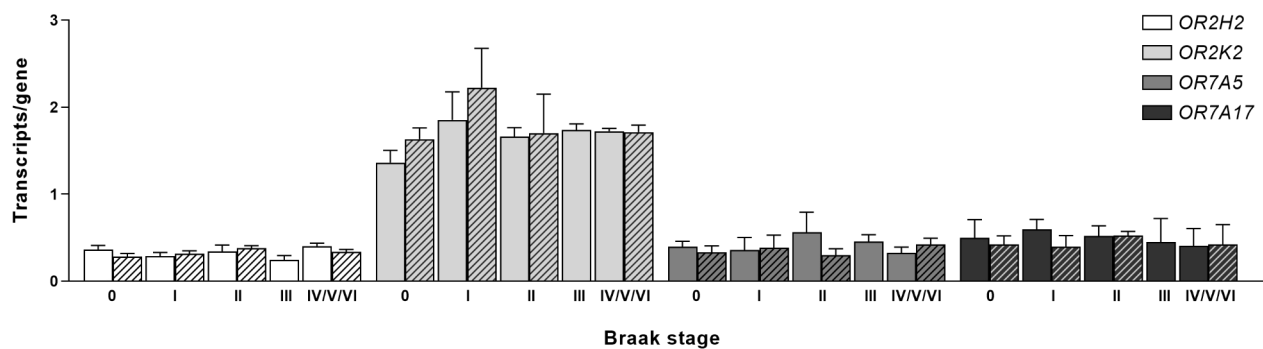

**(b)**

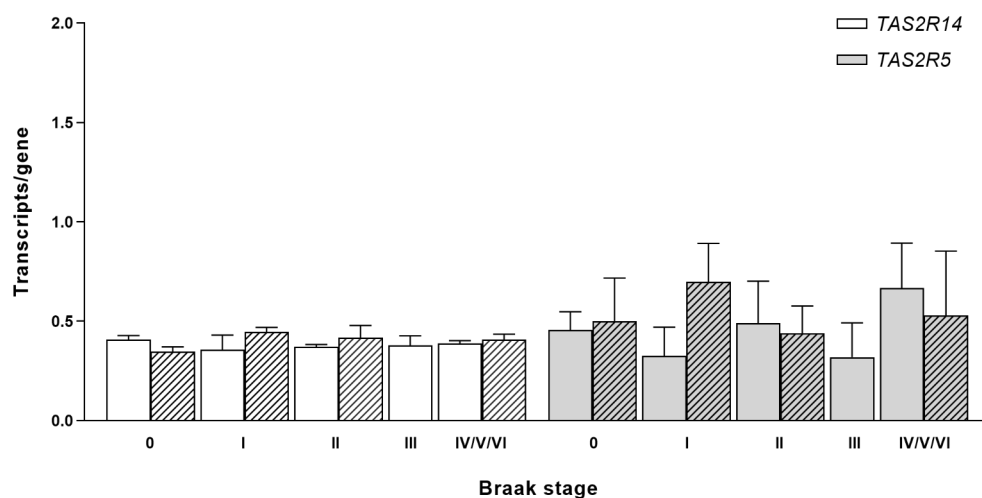

**Figure S1. Comparison of chemoreceptors expression between males and females.** Absolute quantification of OR (A) and TAS2R (B) genes transcription was conducted using selfie-dPCR. Solid bars denote data from males, while dashed bars represent females. Males and females were compared across each Braak stage using one-way ANOVA followed by Sidak multiple comparison test.

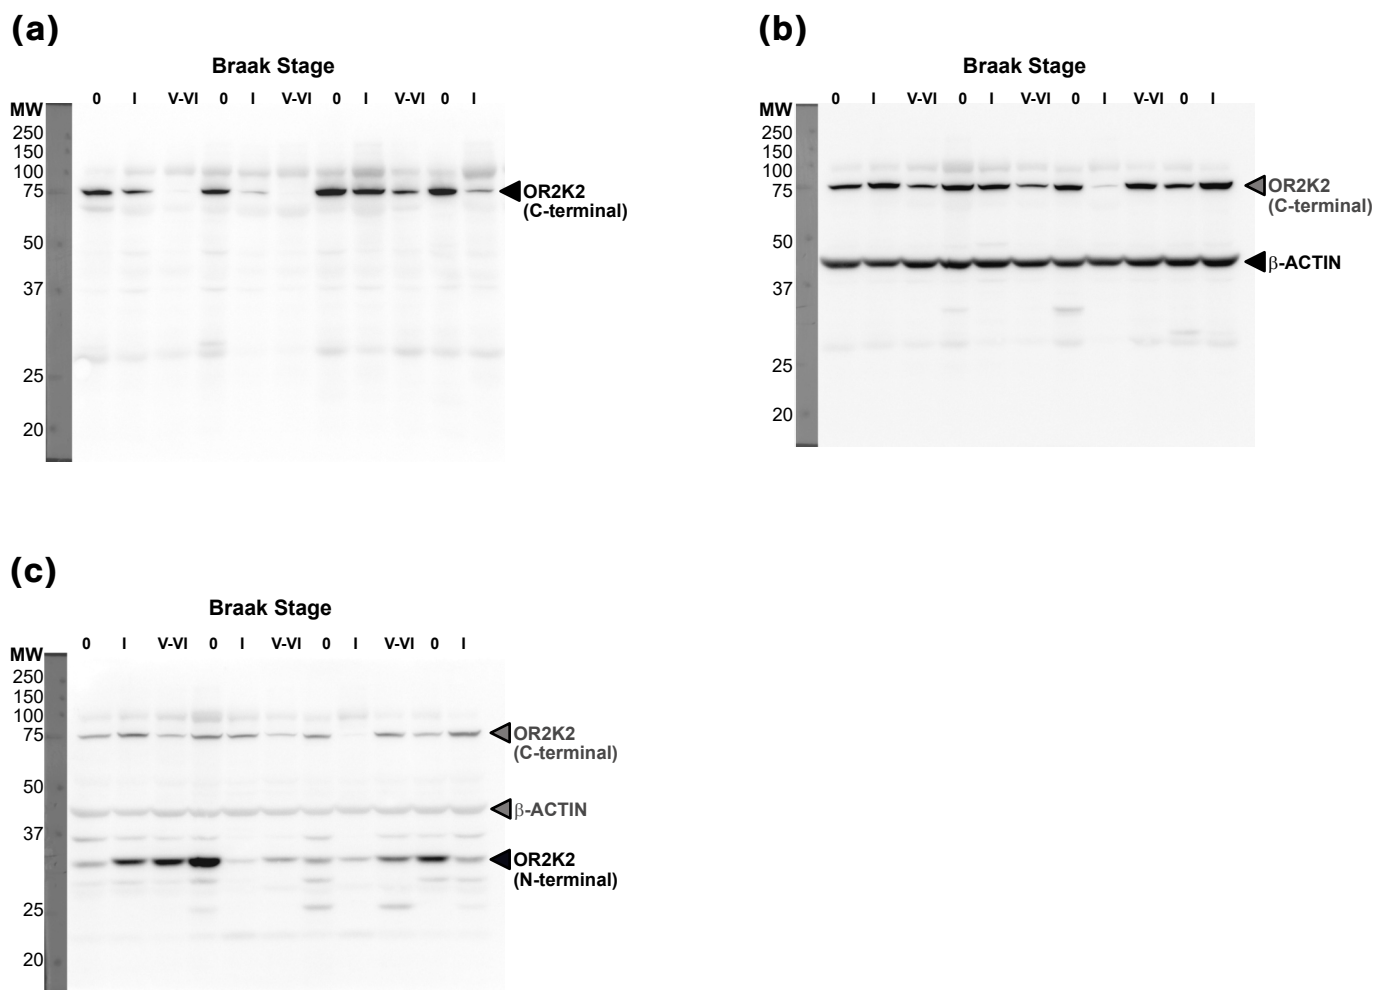

**Figure S2. Quantification of OR2K2 in the Choroid Plexus Across Braak Stages.** Western blot analysis was employed to assess the relative protein levels of OR2K2 in the choroid plexus at various Braak stages. Two distinct antibodies were utilized, with  $\beta$ -Actin serving as protein loading control. **(A)** Full immunoblot of OR2K2 using the C-terminal antibody. **(B)** Full immunoblot of  $\beta$ -Actin. **(C)** Full immunoblot of OR2K2 using the N-terminal antibody, with this membrane re-probed from the immunoblot in panel B. Solid black arrows and accompanying names indicate the protein being blotted, while solid grey arrows and names denote proteins from previous blots. Molecular weights (MW) are represented by a ladder (kDa) for reference.
